# Supplementary material
Source: Frontiers journal article supplement (https://www.frontiersin.org/articles/168201)
Supplement: Data_Sheet_1.PDF [file Data_Sheet_1.PDF]

## **Appendix A. Game Motivation Scale**

Adapted from (Lafrenière et al., 2012).

Participants were asked the following question: “Why did you play this game?”

Each item was rated on a 7-point Likert scale ranging from 1 (“do not agree at all”) to 7 (“very strongly agree”).

### **Intrinsic motivation**

1. Because it is stimulating to play
2. For the pleasure of trying/experiencing new game options
3. For the feeling of efficacy I experience when I play

### **Integrated regulation**

1. Because it is an extension of me
2. Because it is an integral part of my life
3. Because it is aligned with my personal values

### **Identified regulation**

1. Because it is a good way to develop important aspects of myself
2. Because it is a good way to develop intellectual abilities that are useful to me
3. Because it has personal significance to me

### **Introjected regulation**

1. Because I feel that I must play regularly
2. Because I must play to feel good about myself
3. Because otherwise I would feel bad about myself

### **External regulation**

1. To gain in-game awards and trophies or character/avatar’s levels and experiences points
2. For the prestige of being a good player

### **Amotivation**

1. It is not clear anymore; I sometimes ask myself if it was good for me
2. I used to have good reasons, but now I am asking myself if I should continue

3. Honestly, I don't know; I have the impression that I'm wasting my time

## **Appendix B. Familiarity with tablets and memory training games**

1. Do you regularly use a tablet?

Yes

No

2. If the answer to question (1) is yes, how often do you use a tablet?

Everyday

3-4 times a week

1-2 times a week

less than once a week

3. Do you regularly use a computer?

Yes

No

4. If the answer to question (3) is yes, how often do you use a computer?

Everyday

3-4 times a week

1-2 times a week

less than once a week

5. If the answer to questions (1) or (3) is yes, what do you primarily use a tablet or computer for?

Check email

Read news

View photos

Chat with family members

Other (specify): \_\_\_\_\_

6. Do you regularly play memory training games of any kind?

Yes

No

7. If the answer to question (6) is yes, how often do you play memory training games?

Everyday

3-4 times a week

1-2 times a week

less than once a week

8. If the answer to question (6) is yes, do you play memory training games using:

Computer

Tablet

Pen-and-paper

Some other means (specify): \_\_\_\_\_

9. If the answer to question (6) is yes, what kind of memory training games do you play? (please specify)

\_\_\_\_\_

10. Are you familiar with the n-back task?

Yes

No

11. Have you trained on the n-back task before?

Yes

No

12. If the answer to question (11) is yes, when have you trained on the n-back task? (please specify year)

\_\_\_\_\_
